# Supplementary material for: Pharmacovigilance evidence of drug induced urinary incontinence in the FDA adverse event reporting system
Source: Springer Nature journal article supplement (doi:10.1038/s41598-025-23379-z), 2025-10-31
Supplement: MOESM1 [file 41598_2025_23379_MOESM1_ESM.pdf]

Dear Editor,

I would like to begin by expressing my gratitude for your hard work. I am writing to inquire about modifications made during the manuscript proofreading process. During the proofreading process, I noticed that the information for Affiliation 2 was insufficiently detailed. Therefore, while maintaining the original information for Affiliation 2, I have made it more specific by adding the department name. I have marked this change in the proof. If this modification does not comply with the journal's requirements, I will adhere to the journal's guidelines and will not request further changes. The manuscript title, "Pharmacovigilance evidence of drug-induced urinary incontinence in the FDA Adverse Event Reporting System," and submission number, "9eeddf36-6478-40a4-86d0-9eeb337de902," are attached. Once again, I would like to express my gratitude for your efforts during the proofreading process. I look forward to your response and greatly appreciate your time and consideration.

Sincerely,  
chen Li

E-mail addresses: lc1269591933@163.com
